# Supplementary material for: Investigating teaching performance in seminars; a questionnaire study with a multi-level approach
Source: PubMed Central journal article supplement (PMC4190460; doi:10.1186/1472-6920-14-203), 2014-09-24
Supplement: 12909_2014_1033_MOESM1_ESM.pdf [file 12909_2014_1033_MOESM1_ESM.pdf]

## Additional file 1: Psychometric properties of USEME instrument according to Spruijt et al.

| Factors                   | Items                                                                                                                           | Rotated factor loadings |            |            |            | Eigenvalues % of variance |      |
|---------------------------|---------------------------------------------------------------------------------------------------------------------------------|-------------------------|------------|------------|------------|---------------------------|------|
|                           |                                                                                                                                 | F1                      | F2         | F3         | F4         |                           |      |
| F1) Teacher               | The teacher explained the topics clearly                                                                                        | <b>.81</b>              | .13        | .01        | -.10       | 6.76                      | 35.6 |
|                           | The teacher had sufficient expertise on the seminar topic to facilitate the seminar group                                       | <b>.69</b>              | .06        | -.06       | -.11       |                           |      |
|                           | The teacher gave useful feedback on my activities                                                                               | <b>.66</b>              | -.06       | .05        | .14        |                           |      |
|                           | The teacher guided us through the questions in an adequate manner                                                               | <b>.82</b>              | .06        | .00        | -.10       |                           |      |
|                           | The teacher adapted the seminar to students' knowledge levels                                                                   | <b>.69</b>              | -.02       | .00        | .11        |                           |      |
|                           | The teacher stimulated us to use our prior knowledge to answer the questions                                                    | <b>.68</b>              | .04        | -.02       | .05        |                           |      |
|                           | The teacher created a safe learning environment during the seminar                                                              | <b>.66</b>              | -.11       | .01        | .02        |                           |      |
|                           | My overall rating of teacher performance is                                                                                     | <b>.80</b>              | .00        | -.00       | -.04       |                           |      |
| F2) Content               | The relevance of the questions for the field of veterinary medicine is sufficiently clear to me                                 | -.16                    | <b>.73</b> | -.08       | .06        | 2.42                      | 12.8 |
|                           | This seminar was well structured                                                                                                | .17                     | <b>.44</b> | .02        | .00        |                           |      |
|                           | This seminar stimulated my interest in the subject matter                                                                       | .05                     | <b>.66</b> | .01        | .05        |                           |      |
|                           | This seminar has increased my understanding of the subject                                                                      | .14                     | <b>.64</b> | .03        | -.05       |                           |      |
|                           | In this seminar it has become clear to me that the content of this seminar is important within the field of veterinary medicine | -.01                    | <b>.74</b> | .04        | .04        |                           |      |
| F3) Extent of preparation | To what extent did you prepare for this seminar                                                                                 | -.01                    | -.04       | <b>.75</b> | -.04       | 1.68                      | 8.9  |
|                           | Before the seminar I thought I was prepared sufficiently to be able to participate actively                                     | .01                     | -.01       | <b>.95</b> | .02        |                           |      |
|                           | After the seminar I thought I had prepared sufficiently to be able to participate actively                                      | -.02                    | .04        | <b>.72</b> | .02        |                           |      |
| F4) Group interaction     | The questions stimulated group discussion sufficiently                                                                          | -.07                    | .20        | -.00       | <b>.69</b> | 1.28                      | 6.7  |
|                           | The structure of the seminar encouraged interaction between students                                                            | -.01                    | -.01       | .01        | <b>.82</b> |                           |      |
|                           | The teacher stimulated group discussion                                                                                         | .47                     | -.14       | -.04       | <b>.48</b> |                           |      |
